# Supplementary material for: Lipids and Phosphorylation Conjointly Modulate Complex Formation of β2-Adrenergic Receptor and β-arrestin2
Source: Front Cell Dev Biol. 2021 Dec 23;9:807913. doi: 10.3389/fcell.2021.807913 (PMC8733679; doi:10.3389/fcell.2021.807913)
Supplement: Supplementary file 3 [file DataSheet2.xlsx]

## Sheet: Sheet1
Arrestin residues	Receptor residues	Probability of residue-residue force stronger than 10 kcal/mol/nm in %					Occurrence of residue-residue force stronger than 10 kcal/mol/nm out of all 500 ns analysis intervals				Average force between arrestin-receptor pairs [kcal/mol/nm] Noninteracting pairs are included with zero force in the average, negative values-attractive forces, positive values= repulsive forces
		β2-AR*/βarr2 CM	pβ2-AR*/βarr2 CM	pβ2-AR*/βarr2 /NM			β2-AR*/βarr2 CM (N=7)	pβ2-AR*/βarr2 CM (N=17)	pβ2-AR*/βarr2 /NM (N=15)		β2-AR*/βarr2 CM	pβ2-AR*/βarr2 CM	pβ2-AR*/βarr2 /NM
THR137	GLU62	0	5.88235	6.66667			0	1	1		-0.992706	0.427509	0.768785
LYS295	GLU62	0	5.88235	0			0	1	0		-0.0437671	-0.715802	-0.297509
ARG66	GLU62	0	11.7647	0			0	2	0		-1.79958	-3.89425	-1.73174
LYS139	ARG63	0	23.5294	20			0	4	3		0.232082	9.85521	9.19052
LYS161	ARG63	0	29.4118	6.66667			0	5.00001	1		1.08255	6.55058	2.17331
ARG162	ARG63	0	35.2941	0			0	6	0		0.0520929	14.666	0.61858
ARG166	ARG63	0	29.4118	0			0	5.00001	0		0.0110204	4.24325	0.672004
ARG66	ARG63	42.8571	41.1765	20			3	7	3		8.31194	22.6901	1.85883
GLU67	ARG63	14.2857	41.1765	33.3333			0.999999	7	5		-4.09567	-8.69168	-14.4322
ASP68	ARG63	57.1429	47.0588	26.6667			4	8	4		-11.894	-12.7184	-7.88232
ASP70	ARG63	14.2857	5.88235	6.66667			0.999999	1	1		-2.50606	-0.852966	-0.783189
THR137	GLN65	14.2857	11.7647	6.66667			0.999999	2	1		0.979463	2.18306	-0.501685
ARG66	GLN65	0	5.88235	6.66667			0	1	1		-1.26226	-1.43461	-2.00822
ASP70	GLN65	14.2857	0	0			0.999999	0	0		-1.7107	-0.106004	1.37447e-06
THR137	THR66	0	17.6471	0			0	3.00001	0		1.56674	3.58134	2.14018
ARG66	THR66	0	11.7647	26.6667			0	2	4		1.32737	2.14946	7.58904
GLU67	THR66	0	17.6471	0			0	3.00001	0		-0.0470249	-4.7426	-1.07248
THR137	VAL67	0	5.88235	0			0	1	0		-0.362668	0.606525	-0.606056
ARG66	THR68	0	17.6471	33.3333			0	3.00001	5		0.796548	4.69086	3.13498
GLU67	THR68	0	23.5294	0			0	4	0		-0.00956494	-5.24547	-0.0577143
LEU69	THR68	0	5.88235	0			0	1	0		-0.392378	0.982941	-0.209428
LEU72	ILE72	14.2857	0	0			0.999999	0	0		1.98964	-0.147717	-0.0518354
ARG66	ARG131	0	11.7647	26.6667			0	2	4		1.56494	3.77546	10.0062
ASP68	ARG131	0	5.88235	40			0	1	6		-0.0867927	-2.46231	-15.4914
LEU69	ARG131	0	5.88235	6.66667			0	1	1		-0.66459	0.111754	-0.780443
ASP70	ARG131	14.2857	5.88235	20			0.999999	1	3		-5.53672	-4.21218	-9.6542
VAL71	ARG131	14.2857	0	6.66667			0.999999	0	1		-1.05375	0.515617	0.997891
LEU72	ARG131	14.2857	11.7647	33.3333			0.999999	2	5		-0.393196	2.43785	1.48764
GLY73	ARG131	14.2857	5.88235	6.66667			0.999999	1	1		-4.41773	1.19389	-0.147807
LEU74	ARG131	0	17.6471	20			0	3.00001	3		0.0920887	2.37853	4.15072
LEU69	ALA134	0	11.7647	20			0	2	3		-0.268285	2.22215	3.81204
SER75	ALA134	0	11.7647	0			0	2	0		-1.53002	2.39039	-0.218139
PHE76	ALA134	0	17.6471	0			0	3.00001	0		-0.496209	2.74597	-0.128473
PHE245	ILE135	0	11.7647	0			0	2	0		-0.861824	-2.86109	-0.677474
SER246	ILE135	0	11.7647	0			0	2	0		-0.784588	1.76029	-1.07461
LEU74	ILE135	0	35.2941	20			0	6	3		5.12142	8.04226	3.71296
PHE76	ILE135	0	17.6471	20			0	3.00001	3		-1.053	3.67569	3.26017
ARG77	ILE135	0	11.7647	0			0	2	0		-0.0982102	-2.16264	-0.0382368
PHE245	THR136	0	17.6471	6.66667			0	3.00001	1		-2.13391	1.72694	1.97903
SER246	THR136	0	29.4118	20			0	5.00001	3		1.19034	3.86618	1.5563
SER246	SER137	0	11.7647	26.6667			0	2	4		-3.42814	-3.38871	-5.00069
LEU141	PRO138	0	5.88235	0			0	1	0		-2.86652	-0.373402	1.23435
ILE242	PRO138	14.2857	17.6471	0			0.999999	3.00001	0		1.256	1.77959	-0.481876
LEU244	PRO138	0	17.6471	0			0	3.00001	0		-0.195972	2.0786	-0.481463
PHE245	PRO138	0	17.6471	26.6667			0	3.00001	4		-0.348089	2.66162	4.00821
ALA248	PRO138	14.2857	17.6471	0			0.999999	3.00001	0		1.27267	2.85992	-0.426346
PHE62	PRO138	0	29.4118	0			0	5.00001	0		-0.583404	4.59494	-0.742462
TYR64	PRO138	28.5714	35.2941	26.6667			2	6	4		7.73025	6.22558	5.76832
PHE76	PRO138	0	11.7647	0			0	2	0		-0.270431	2.51376	-0.506604
LEU130	PHE139	14.2857	23.5294	20			0.999999	4	3		3.46482	5.41988	5.03232
LEU141	PHE139	71.4286	41.1765	73.3333			5	7	11		14.9276	9.14007	15.8733
ILE242	PHE139	71.4286	76.4706	73.3333			5	13	11		17.2481	15.0955	14.3715
LEU244	PHE139	57.1429	41.1765	33.3333			4	7	5		9.82353	7.22504	8.92206
SER246	PHE139	0	5.88235	0			0	1	0		-1.20396	0.799123	-1.14518
ALA248	PHE139	0	35.2941	0			0	6	0		2.65617	5.91286	3.76011
TYR250	PHE139	28.5714	11.7647	40			2	2	6		8.30755	1.73299	6.6244
PHE62	PHE139	28.5714	29.4118	20			2	5.00001	3		6.94463	7.95259	5.7303
TYR64	PHE139	14.2857	5.88235	13.3333			0.999999	1	2		6.81733	0.534214	1.33529
THR247	LYS140	28.5714	29.4118	46.6667			2	5.00001	7		-6.17394	-7.5824	-8.83952
ALA248	LYS140	71.4286	11.7647	60			5	2	9		12.2939	5.68918	10.8999
GLN249	LYS140	28.5714	29.4118	46.6667			2	5.00001	7		-10.6672	-3.30925	-10.5005
TYR250	LYS140	28.5714	35.2941	6.66667			2	6	1		4.52064	7.33631	-0.015011
ARG66	TYR141	0	5.88235	26.6667			0	1	4		-0.833708	1.39745	6.5885
LEU69	TYR141	0	11.7647	0			0	2	0		0.625025	2.39294	-0.187906
ASP136	GLN142	0	17.6471	26.6667			0	3.00001	4		-0.909272	-2.02204	-6.05733
LEU141	GLN142	14.2857	29.4118	20			0.999999	5.00001	3		4.08858	8.53652	4.59739
ARG286	GLN142	42.8571	5.88235	13.3333			3	1	2		-8.88126	-2.78199	-3.21612
ARG66	GLN142	0	11.7647	13.3333			0	2	2		-1.37056	-2.69223	-3.98528
ASP136	SER143	0	11.7647	0			0	2	0		0.0704234	-1.77865	-0.261592
TYR250	SER143	14.2857	17.6471	26.6667			0.999999	3.00001	4		3.29852	3.74789	6.18691
ARG286	SER143	0	5.88235	26.6667			0	1	4		-0.105161	-3.54358	-3.25744
ARG286	LEU144	14.2857	0	0			0.999999	0	0		-5.78439	-1.33806	-1.3931
GLU135	LEU145	14.2857	0	0			0.999999	0	0		-2.19585	0.00944765	-0.153609
ARG286	LEU145	14.2857	11.7647	13.3333			0.999999	2	2		0.987729	-3.17039	-5.53645
ARG66	LEU145	0	5.88235	0			0	1	0		-0.323969	-2.06997	-0.228504
GLU135	THR146	14.2857	0	6.66667			0.999999	0	1		-4.34299	-2.14114	-2.16653
ASP136	THR146	0	17.6471	20			0	3.00001	3		-1.30585	-7.37495	-4.78259
ARG286	THR146	28.5714	41.1765	46.6667			2	7	7		10.7929	7.04955	10.1984
GLU135	LYS147	100	94.1176	80			7	16	12		-106.753	-70.2149	-65.5559
ASP136	LYS147	0	29.4118	33.3333			0	5.00001	5		-1.70813	-8.60565	-6.87362
GLU284	LYS147	0	5.88235	20			0	1	3		-0.646219	-1.116	-4.11967
ARG286	LYS147	14.2857	5.88235	0			0.999999	1	0		3.36832	2.23983	3.41189
GLU135	ASN148	0	11.7647	0			0	2	0		-0.749394	-1.94257	-1.61909
ARG286	ASN148	0	5.88235	0			0	1	0		0.880216	1.69906	0.264265
GLU284	LYS149	0	5.88235	0			0	1	0		-0.161372	-0.946222	-0.107898
ARG286	LYS149	0	23.5294	0			0	4	0		2.44163	7.25955	1.79363
GLU135	ARG151	0	52.9412	20			0	9	3		-4.32219	-24.6107	-6.92682
LEU74	VAL222	0	29.4118	6.66667			0	5.00001	1		0.2733	5.09656	0.919862
SER246	GLU225	0	17.6471	6.66667			0	3.00001	1		-3.21288	-5.18815	-2.79861
THR247	GLU225	0	11.7647	0			0	2	0		-0.0184057	-1.76492	-0.0251301
ARG77	GLU225	0	17.6471	0			0	3.00001	0		-0.000909711	-12.3731	-0.00282903
LEU74	ALA226	14.2857	5.88235	13.3333			0.999999	1	2		0.561547	3.18565	1.59527
SER75	ALA226	0	5.88235	0			0	1	0		-0.785335	0.819287	-0.433485
PHE76	ALA226	14.2857	0	0			0.999999	0	0		3.04234	-0.287107	-0.536146
SER246	ARG228	0	5.88235	0			0	1	0		-0.0778629	1.30876	-0.0141692
ARG77	ARG228	0	5.88235	0			0	1	0		-0.0103806	1.87191	-0.00095583
LEU244	GLN229	0	17.6471	0			0	3.00001	0		-1.34288	-3.06775	-0.896992
PHE245	GLN229	42.8571	11.7647	13.3333			3	2	2		8.10028	3.27964	4.43233
SER75	GLN229	42.8571	0	6.66667			3	0	1		-7.41748	-0.0368974	0.128198
PHE76	GLN229	42.8571	23.5294	6.66667			3	4	1		5.97794	2.09144	0.668835
LYS78	GLN229	14.2857	0	13.3333			0.999999	0	2		-3.1207	-0.602763	-4.85628
PHE76	LEU230	28.5714	5.88235	6.66667			2	1	1		6.62728	1.70827	1.73476
LYS313	GLN231	14.2857	0	0			0.999999	0	0		-3.40877	-0.437564	0.0550113
PHE245	LYS232	28.5714	5.88235	20			2	1	3		8.20009	0.688216	3.73534
ASN312	LYS232	14.2857	0	0			0.999999	0	0		-2.62318	-0.19474	-0.295357
LYS313	LYS232	28.5714	0	20			2	0	3		7.35184	-0.532897	3.56403
GLU314	LYS232	28.5714	76.4706	86.6667			2	13	13		-30.6211	-53.6985	-55.9933
VAL315	LYS232	0	17.6471	0			0	3.00001	0		-0.663102	-2.5433	-0.0661935
LEU316	LYS232	0	11.7647	0			0	2	0		0.0145287	2.22826	0.000509551
ARG77	LYS232	0	11.7647	0			0	2	0		-0.175622	1.59614	0.0260902
LYS78	LYS232	42.8571	0	33.3333			3	0	5		-6.96371	-0.657764	1.4912
VAL315	ILE233	14.2857	0	0			0.999999	0	0		1.12524	-0.109995	0.389979
LEU316	ILE233	0	5.88235	0			0	1	0		-0.100126	0.97318	-0.0586702
PHE76	ILE233	28.5714	11.7647	20			2	2	3		5.67569	2.25856	6.05482
ARG77	ILE233	14.2857	0	0			0.999999	0	0		2.26171	-0.0530243	-0.96743
LYS78	ILE233	0	5.88235	33.3333			0	1	5		1.34949	2.05748	1.38895
LYS313	ASP234	42.8571	23.5294	0			3	4	0		-8.95623	-15.3972	-0.162638
LYS78	ASP234	28.5714	0	46.6667			2	0	7		-21.067	-0.306191	-48.8846
PHE81	ASP234	0	5.88235	0			0	1	0		-0.00865204	-1.17529	-0.137287
ASN312	LYS235	28.5714	0	0			2	0	0		-4.6024	-0.0933357	0.0222755
GLU314	LYS235	57.1429	5.88235	6.66667			4	1	1		-43.2049	-3.27782	-6.48655
ARG77	LYS235	14.2857	0	6.66667			0.999999	0	1		6.01722	0.0264041	-0.232384
LYS78	LYS235	42.8571	0	33.3333			3	0	5		17.8231	0.0235321	8.26071
ASP79	LYS235	57.1429	0	60			4	0	9		-11.6546	-0.206656	-52.049
LEU80	LYS235	14.2857	0	0			0.999999	0	0		-2.38999	-0.0574771	-0.767596
GLU314	SER236	14.2857	11.7647	0			0.999999	2	0		-2.75375	-2.48346	0.407749
ILE82	SER236	0	11.7647	0			0	2	0		-0.104424	1.73542	-0.00965096
GLU156	GLU237	0	5.88235	0			0	1	0		0.162701	1.41427	1.16049
LYS158	GLU237	14.2857	17.6471	26.6667			0.999999	3.00001	4		-3.22278	-11.4815	-16.311
LYS313	GLU237	28.5714	29.4118	13.3333			2	5.00001	2		-7.16692	-13.0326	-3.70956
GLU314	GLU237	14.2857	5.88235	0			0.999999	1	0		2.1655	0.94666	0.101862
ARG77	GLU237	14.2857	0	0			0.999999	0	0		-1.82213	-0.0842196	-0.713078
LYS78	GLU237	42.8571	11.7647	0			3	2	0		-17.5458	-8.64926	-0.126831
ASP79	GLU237	14.2857	11.7647	0			0.999999	2	0		4.91831	2.03622	0.0103133
LEU155	GLY238	0	11.7647	0			0	2	0		-0.000198355	1.22687	-0.000426405
GLU156	GLY238	0	5.88235	0			0	1	0		-0.0237584	0.681648	-0.0243827
ASP79	GLY238	0	5.88235	0			0	1	0		1.08599	0.565909	-0.00748714
GLU156	ARG239	14.2857	5.88235	6.66667			0.999999	1	1		-5.57397	-1.18155	-1.48554
LYS313	ARG239	0	11.7647	6.66667			0	2	1		-0.00660387	3.22509	1.54101
GLU314	ARG239	14.2857	5.88235	0			0.999999	1	0		-4.05143	-1.35866	-0.567826
LYS78	ARG239	0	11.7647	6.66667			0	2	1		1.46535	2.79035	4.96188
ASP79	ARG239	42.8571	0	0			3	0	0		-12.6066	-0.646145	-0.311625
PRO121	PHE240	14.2857	5.88235	0			0.999999	1	0		1.6914	1.67791	0.437451
LYS78	HIS241	0	5.88235	0			0	1	0		0.0430759	-1.15871	-0.423738
ALA83	HIS241	0	5.88235	0			0	1	0		-0.100498	-1.5024	-0.0832294
PRO97	HIS241	0	5.88235	0			0	1	0		-0.000296049	1.71485	-0.00104913
THR119	VAL242	14.2857	0	0			0.999999	0	0		1.46499	-0.299319	0.30412
PRO121	VAL242	14.2857	0	6.66667			0.999999	0	1		2.028	0.325378	0.793493
LEU316	VAL242	0	5.88235	0			0	1	0		-0.00255371	0.737765	-0.000623184
ALA83	VAL242	0	11.7647	0			0	2	0		0.0287091	1.86971	-0.030991
THR119	GLN243	0	5.88235	0			0	1	0		-0.693094	0.972955	-0.089137
TYR85	GLN243	0	5.88235	0			0	1	0		-0.123769	-1.51894	-0.0339981
ALA83	ASN244	0	5.88235	0			0	1	0		-0.743206	0.5953	-0.152842
PRO95	ASN244	14.2857	0	0			0.999999	0	0		-1.43025	-0.536965	-0.0498294
LEU124	LEU245	0	5.88235	0			0	1	0		-0.0101385	0.78885	-0.00513745
ALA83	LEU245	14.2857	0	0			0.999999	0	0		4.98532	-0.0779739	0.00082062
TYR85	LEU245	14.2857	0	0			0.999999	0	0		1.84519	-0.0598713	-0.0257573
GLU157	SER246	0	11.7647	0			0	2	0		-2.88903e-05	3.60588	0.00387423
LYS158	SER246	0	5.88235	0			0	1	0		-0.000398575	-1.58969	-0.014801
LYS313	SER246	0	17.6471	20			0	3.00001	3		-0.000308923	-13.5373	-22.3628
LYS34	SER246	0	5.88235	0			0	1	0		-3.02734e-06	-0.662063	1.11493e-06
LYS78	SER246	0	5.88235	0			0	1	0		-0.577697	-1.67954	-0.468293
THR84	SER246	14.2857	0	0			0.999999	0	0		3.86626	-1.76586	-0.027178
LEU155	GLN247	0	5.88235	0			0	1	0		-0.168202	1.69809	0.0108354
THR84	GLN247	0	11.7647	0			0	2	0		-0.637679	1.25942	-0.169219
TYR85	GLN247	0	11.7647	0			0	2	0		-0.375769	-2.33734	-0.0555714
LYS153	GLU249	0	5.88235	6.66667			0	1	1		0.0894636	-0.30025	-1.19514
SER154	GLU249	0	5.88235	0			0	1	0		-0.183273	-2.17815	-0.535084
LYS53	GLU249	14.2857	17.6471	6.66667			0.999999	3.00001	1		-3.60268	-7.78496	-1.98686
ARG77	GLU249	14.2857	0	0			0.999999	0	0		-12.6666	2.85377e-05	-4.12203e-06
ASP79	GLU249	28.5714	0	0			2	0	0		5.68178	0.00131667	0.000866416
LYS153	ASP251	0	5.88235	0			0	1	0		0.00125806	-0.85959	-0.297184
GLU156	ASP251	0	11.7647	0			0	2	0		1.2072	2.3223	0.0345115
LYS158	ASP251	14.2857	0	0			0.999999	0	0		-8.81018	-0.153552	-0.359466
LYS313	ASP251	28.5714	0	0			2	0	0		-9.55797	-0.00133909	-0.104294
LYS53	ASP251	0	5.88235	0			0	1	0		-0.0270996	-2.40103	-0.00609667
GLU156	ARG253	0	29.4118	6.66667			0	5.00001	1		-1.5599	-18.6976	-0.775095
GLU157	ARG253	0	5.88235	0			0	1	0		-0.256034	-2.37356	-0.133477
LYS158	ARG253	0	11.7647	0			0	2	0		-0.287315	2.66448	0.0784767
ARG77	ARG253	14.2857	0	0			0.999999	0	0		1.71844	0.000253269	-2.66303e-05
LYS78	ARG253	0	5.88235	0			0	1	0		0.0918202	1.68935	0.0105531
GLU157	HIS256	0	5.88235	0			0	1	0		-0.0956183	-1.21172	1.17613e-06
GLU156	ARG259	0	23.5294	6.66667			0	4	1		-1.3537	-9.74018	-2.45627
ARG148	SER261	0	17.6471	0			0	3.00001	0		0.000119789	-18.4434	0
LEU155	SER261	0	5.88235	0			0	1	0		-0.0324853	1.65757	-0.000335315
GLU156	SER261	14.2857	52.9412	0			0.999999	9	0		-1.64619	10.3829	0.221228
LYS158	SER261	0	41.1765	0			0	7	0		-0.0315648	-42.2293	-0.0553923
SER159	SER261	0	11.7647	0			0	2	0		-0.000663313	-2.05557	-2.92525e-05
LYS313	SER261	0	5.88235	0			0	1	0		0	-5.42281	-0.000263332
GLU314	SER261	0	5.88235	0			0	1	0		0	0.820351	0.000315095
LYS78	SER261	0	17.6471	0			0	3.00001	0		0.00353066	-8.57007	-0.104421
ARG148	SER262	0	5.88235	0			0	1	0		0	-3.22041	-0.0120067
GLU157	SER262	0	5.88235	0			0	1	0		-0.00852046	1.19702	0.156544
LYS158	SER262	0	52.9412	6.66667			0	9	1		-0.00541384	-57.1091	-5.52105
SER159	SER262	0	5.88235	0			0	1	0		-9.39411e-06	-0.913093	-0.00336675
LYS161	SER262	0	11.7647	0			0	2	0		0	-16.3651	-6.94093e-05
ARG63	SER262	0	5.88235	0			0	1	0		0	-1.54373	-0.00869932
ASP70	SER262	0	29.4118	0			0	5.00001	0		0	16.154	0.00124908
LEU74	SER262	0	5.88235	0			0	1	0		-7.06764e-07	1.84906	-6.28936e-06
SER75	SER262	0	5.88235	0			0	1	0		0	0.517547	-0.0188998
ARG77	SER262	0	35.2941	6.66667			0	6	1		1.53814e-06	-29.4935	0.661875
LYS78	SER262	0	58.8235	13.3333			0	10	2		-0.000102265	-59.8074	-20.2065
ASP79	SER262	0	47.0588	13.3333			0	8	2		3.31811e-06	12.1795	3.96438
GLU156	LYS263	28.5714	23.5294	6.66667			2	4	1		-9.1583	-8.08535	-1.2294
GLU157	LYS263	0	5.88235	6.66667			0	1	1		-1.05962	-1.8648	-1.61461
LYS158	LYS263	0	11.7647	0			0	2	0		1.58738	3.15797	0.537286
LYS161	LYS263	0	11.7647	0			0	2	0		0.000934145	2.45102	0.00123255
LEU69	LYS263	0	5.88235	0			0	1	0		-0.000246401	1.26246	-0.00835168
SER75	LYS263	0	5.88235	0			0	1	0		0.000568783	0.852045	-0.0404582
LYS78	LYS263	0	17.6471	6.66667			0	3.00001	1		-0.0182416	3.10597	2.25211
ASP79	LYS263	0	11.7647	13.3333			0	2	2		-0.0266043	-4.89334	-7.11812
ASP70	PHE264	0	5.88235	0			0	1	0		-0.0664896	-1.03946	-0.00739805
SER75	PHE264	0	5.88235	0			0	1	0		-0.0278001	1.1424	-0.401064
ARG77	PHE264	0	17.6471	0			0	3.00001	0		-0.310885	2.44258	-0.647305
LYS78	PHE264	0	5.88235	13.3333			0	1	2		0.0533895	2.50438	2.63771
LYS158	LYS267	0	17.6471	6.66667			0	3.00001	1		1.27548	5.31863	1.36461
GLU67	LYS267	0	11.7647	0			0	2	0		-0.795275	-6.99647	-0.594062
ASP68	LYS267	0	11.7647	0			0	2	0		-0.398822	-4.78726	-0.739088
LEU69	LYS267	0	5.88235	0			0	1	0		0.0769231	0.422552	0.210508
ASP70	LYS267	0	52.9412	40			0	9	6		-0.293702	-25.1949	-30.5787
VAL71	LYS267	0	23.5294	0			0	4	0		1.36909	0.598036	1.51686
LEU72	LYS267	0	5.88235	0			0	1	0		0.420494	-2.39068	0.0797306
GLY73	LYS267	0	23.5294	0			0	4	0		-1.27051	-1.70453	-2.03576
LEU74	LYS267	0	23.5294	6.66667			0	4	1		-1.28888	-2.0634	2.1861
SER75	LYS267	14.2857	17.6471	0			0.999999	3.00001	0		-2.15792	-4.06135	0.517782
ARG77	LYS267	0	17.6471	0			0	3.00001	0		0.870536	8.24031	0.186173
LYS78	LYS267	0	29.4118	0			0	5.00001	0		0.0845565	8.16798	0.0869304
ASP79	LYS267	14.2857	0	0			0.999999	0	0		-12.4635	-0.306342	-0.185069
GLY73	GLU268	0	5.88235	0			0	1	0		-0.0622048	1.11123	-0.0393674
SER75	GLU268	0	5.88235	0			0	1	0		-0.0655789	-2.57088	-0.0515005
PHE76	GLU268	0	17.6471	0			0	3.00001	0		-1.41849	4.20784	0.0232526
LYS78	GLU268	14.2857	17.6471	0			0.999999	3.00001	0		-11.5686	-22.7648	-0.0118567
VAL71	ALA271	0	5.88235	26.6667			0	1	4		-0.774903	0.522224	4.51667
LEU72	ALA271	14.2857	11.7647	13.3333			0.999999	2	2		4.1201	1.96423	1.48848
LEU74	ALA271	57.1429	11.7647	6.66667			4	2	1		7.98359	3.40082	2.12071
PHE76	ALA271	14.2857	0	0			0.999999	0	0		1.47314	-0.106679	0.442711
GLY73	THR274	14.2857	0	0			0.999999	0	0		1.72208	-0.894598	-0.586828
LEU72	ILE278	28.5714	0	0			2	0	0		3.45318	-0.343477	1.11306
VAL71	ARG328	14.2857	0	13.3333			0.999999	0	2		2.16775	-0.714638	-1.24732
ASP68	SER329	0	11.7647	6.66667			0	2	1		-1.19382	-2.36149	-2.98983
LEU69	PRO330	28.5714	0	6.66667			2	0	1		3.89183	-0.169525	2.85251
LYS161	ASP331	14.2857	0	0			0.999999	0	0		-4.08782	-0.495587	-0.640998
ARG66	ASP331	71.4286	11.7647	33.3333			5	2	5		-50.2841	-4.79773	-17.437
GLU67	ASP331	14.2857	17.6471	6.66667			0.999999	3.00001	1		3.96966	4.69999	1.95891
ASP68	ASP331	42.8571	5.88235	40			3	1	6		10.8529	2.16012	11.9685
ASP70	ASP331	28.5714	0	0			2	0	0		3.87382	0.277096	0.235646
LEU72	ASP331	0	5.88235	0			0	1	0		-0.323259	-0.658838	-0.226441
GLY73	ASP331	0	5.88235	0			0	1	0		-0.0309287	-1.11614	-0.00426053
LEU74	ASP331	0	5.88235	0			0	1	0		2.18257e-05	-1.64064	-0.0113609
ASP68	ARG333	0	5.88235	0			0	1	0		-0.0798627	-2.22337	-0.170657
LEU69	ILE334	0	5.88235	0			0	1	0		-0.018661	0.9892	-0.0141328
LEU72	ILE334	0	5.88235	0			0	1	0		-9.00117e-05	1.43643	-0.000271134
ARG162	GLU338	14.2857	11.7647	6.66667			0.999999	2	1		-1.96622	-3.24628	-0.955089
ARG66	ARG343	0	11.7647	0			0	2	0		0	3.61956	0.0014172
ASP68	ARG343	0	11.7647	0			0	2	0		0	-6.77999	-0.00015949
ARG162	ARG344	0	5.88235	0			0	1	0		0.000582567	1.57745	0.376975
ARG66	ARG344	0	5.88235	0			0	1	0		0	0.765292	0
ARG162	SER345	0	23.5294	6.66667			0	4	1		-0.00258701	-6.56055	-8.75589
ARG66	SER345	0	17.6471	0			0	3.00001	0		-5.15187e-05	-16.7307	-0.0128887
ASP68	SER345	0	5.88235	0			0	1	0		-1.5524e-06	2.46422	0.0064079
HIS160	SER346	0	5.88235	0			0	1	0		-0.00799356	-2.91533	-1.39081
LYS161	SER346	0	29.4118	20			0	5.00001	3		-0.00569928	-23.1829	-22.7395
ARG162	SER346	0	35.2941	33.3333			0	6	5		-0.0995582	-46.0052	-28.2756
ARG66	SER346	0	17.6471	0			0	3.00001	0		-0.000549194	-16.8458	-0.000453146
GLU67	SER346	0	5.88235	0			0	1	0		0	1.89041	0.000190425
ASP68	SER346	0	5.88235	0			0	1	0		4.60683e-05	1.99162	0.00822851
ARG162	LYS348	0	35.2941	20			0	6	3		-0.0796902	20.2416	10.8014
ARG66	LYS348	0	17.6471	0			0	3.00001	0		0.0760129	9.66892	0.000472336
PRO15	ALA349	0	5.88235	0			0	1	0		-0.0549461	1.37574	-0.196461
ARG162	ASN352	0	5.88235	6.66667			0	1	1		-0.864861	-2.3626	-1.14176
ARG162	GLY353	0	11.7647	20			0	2	3		-0.545216	1.11421	-2.28189
THR129	TYR354	0	5.88235	0			0	1	0		0	0.927386	0.499393
LYS139	TYR354	0	5.88235	6.66667			0	1	1		-0.013666	1.94857	0.990814
PRO15	TYR354	0	5.88235	0			0	1	0		0.102829	1.39609	-0.0900596
LYS161	TYR354	0	17.6471	0			0	3.00001	0		-0.291182	1.78834	1.16135
ARG162	TYR354	0	5.88235	6.66667			0	1	1		0.0814066	3.66663	1.44229
LYS295	TYR354	0	5.88235	6.66667			0	1	1		-0.0248228	-0.789672	-0.961807
ARG66	TYR354	0	5.88235	6.66667			0	1	1		0.294754	-1.67661	1.10142
GLY138	SER355	0	17.6471	0			0	3.00001	0		0.0148166	-3.65953	-0.905111
LYS139	SER355	0	76.4706	73.3333			0	13	11		-0.0267128	-69.9418	-109.235
GLU146	SER355	0	17.6471	46.6667			0	3.00001	7		3.01691e-06	3.08912	9.98235
ARG148	SER355	0	11.7647	13.3333			0	2	2		-6.29043e-05	-2.49433	-3.9377
LYS161	SER355	0	76.4706	80			0	13	12		-0.239465	-99.5799	-91.1865
ARG162	SER355	0	82.3529	66.6667			0	14	10		-0.347647	-76.9338	-64.2372
ARG166	SER355	0	100	100			0	17	15		-0.00602742	-91.0758	-113.57
LYS293	SER355	0	5.88235	40			0	1	6		-8.79324e-05	-1.20897	-19.867
LYS295	SER355	0	35.2941	53.3333			0	6	8		-0.102948	-32.189	-43.3123
ARG63	SER355	0	11.7647	40			0	2	6		-8.97732e-06	-7.28386	-30.4664
ARG66	SER355	0	52.9412	20			0	9	3		-0.0297763	-51.728	-13.5197
GLU67	SER355	0	35.2941	40			0	6	6		-0.00217178	12.867	19.7023
ASP68	SER355	0	41.1765	6.66667			0	7	1		0.166255	22.6677	5.9194
LYS12	SER356	0	94.1176	100			0	16	15		-0.00384331	-168.994	-182.148
SER13	SER356	0	5.88235	0			0	1	0		-0.00631484	3.50368	3.3232
THR137	SER356	14.2857	0	0			0.999999	0	0		2.79576	-0.0231696	0.00187519
LYS139	SER356	0	35.2941	6.66667			0	6	1		-0.143361	-16.1999	-1.78903
ASP144	SER356	0	5.88235	0			0	1	0		-4.05721e-05	1.20496	0.118283
GLU146	SER356	0	23.5294	0			0	4	0		-9.4142e-05	7.55295	4.46477
ARG148	SER356	0	5.88235	13.3333			0	1	2		6.39237e-07	-2.1489	-9.24678
LYS161	SER356	0	47.0588	53.3333			0	8	8		-0.0388424	-39.8084	-50.8499
ARG162	SER356	0	35.2941	86.6667			0	6	13		-0.149332	-26.821	-66.6368
VAL165	SER356	0	5.88235	60			0	1	9		-5.08672e-05	-6.79547	-8.88974
ARG166	SER356	0	100	100			0	17	15		-0.00159658	-102.806	-99.054
VAL168	SER356	0	5.88235	0			0	1	0		-0.000291795	-3.69406	-2.9098
LYS295	SER356	0	58.8235	66.6667			0	10	10		-0.173287	-52.0942	-84.6182
HIS296	SER356	0	17.6471	0			0	3.00001	0		-0.00166029	-4.0717	-1.29987
ARG63	SER356	0	5.88235	0			0	1	0		-0.00146548	-8.90194	-0.778701
GLU67	SER356	0	17.6471	0			0	3.00001	0		-0.04792	3.36287	-0.0331575
LYS12	ASN357	0	29.4118	53.3333			0	5.00001	8		-0.0129726	-2.50351	-8.31963
SER13	ASN357	0	5.88235	13.3333			0	1	2		-0.0616743	1.49576	2.06645
ASP136	ASN357	42.8571	0	0			3	0	0		-6.56011	-0.00295606	-4.04791e-06
THR137	ASN357	14.2857	0	0			0.999999	0	0		-3.90762	-0.0607829	-0.00291656
LYS295	ASN357	0	17.6471	46.6667			0	3.00001	7		-0.503239	-5.6783	-11.0774
LYS12	GLY358	0	17.6471	26.6667			0	3.00001	4		-0.0161573	-3.39573	-7.1837
PRO132	GLY358	14.2857	0	0			0.999999	0	0		2.95231	-0.000538989	-6.81333e-07
ASP136	GLY358	14.2857	0	0			0.999999	0	0		3.76342	-2.59112e-05	-0.000158591
LYS295	GLY358	0	5.88235	13.3333			0	1	2		-1.38363	-1.59002	1.55604
HIS296	GLY358	0	11.7647	6.66667			0	2	1		-0.033525	1.75935	-1.36959
LYS12	ASN359	0	5.88235	13.3333			0	1	2		-0.105148	-1.68278	-5.54197
GLY138	ASN359	14.2857	0	0			0.999999	0	0		2.2282	-0.000162352	0
LYS139	ASN359	28.5714	0	0			2	0	0		-4.84815	-0.00409135	1.29731e-05
ALA140	ASN359	28.5714	0	0			2	0	0		5.72051	-6.97527e-05	-4.40392e-07
ARG26	ASN359	0	29.4118	13.3333			0	5.00001	2		0.000434843	-5.57059	-4.55454
LYS295	ASN359	0	17.6471	0			0	3.00001	0		-0.656655	2.76855	-2.43601
GLU297	ASN359	0	17.6471	13.3333			0	3.00001	2		-0.0489158	-4.36116	2.2632
LYS139	THR360	28.5714	0	0			2	0	0		-4.43039	-0.077191	0
PHE10	GLY361	0	41.1765	20			0	7	3		-0.00981685	7.89693	2.84388
GLY138	GLY361	14.2857	0	0			0.999999	0	0		2.30919	0	0
LYS295	GLY361	0	5.88235	0			0	1	0		-1.63645	0.690603	0.437346
HIS296	GLY361	0	5.88235	0			0	1	0		-0.173656	-1.23346	-0.161203
ARG8	GLY361	0	35.2941	53.3333			0	6	8		-0.001821	4.91341	12.8502
VAL9	GLY361	0	17.6471	40			0	3.00001	6		-0.00199446	-3.99078	-2.40717
LYS108	GLU362	0	17.6471	53.3333			0	3.00001	8		-0.00041837	-4.65265	-17.7811
LYS11	GLU362	0	100	100			0	17	15		-0.600118	-66.2714	-74.2579
LYS12	GLU362	85.7143	0	0			6	0	0		-48.7794	-0.781944	-1.21759
LYS139	GLU362	71.4286	0	0			5	0	0		-13.3665	-0.00118503	0
ARG148	GLU362	14.2857	0	0			0.999999	0	0		-4.8604	0	0
LYS158	GLU362	14.2857	0	0			0.999999	0	0		-4.43699	0	0
LYS161	GLU362	71.4286	0	0			5	0	0		-12.3063	-0.000284503	-0.000228395
ARG166	GLU362	42.8571	0	0			3	0	0		-11.0472	-0.00551383	-0.00103629
TYR22	GLU362	0	5.88235	53.3333			0	1	8		-0.0104168	-3.6454	-10.6943
ARG26	GLU362	14.2857	0	0			0.999999	0	0		-3.66781	-0.480337	-1.0541
LYS295	GLU362	28.5714	0	13.3333			2	0	2		-11.5295	-0.764058	-2.24941
HIS296	GLU362	0	5.88235	0			0	1	0		-1.29142	0.856623	-0.0772518
LYS4	GLU362	0	23.5294	6.66667			0	4	1		0.00156391	-5.79027	-3.68115
GLU67	GLU362	14.2857	0	0			0.999999	0	0		2.91399	-2.94718e-07	0
ARG8	GLU362	0	29.4118	26.6667			0	5.00001	4		-0.211174	-8.1499	-8.22754
VAL9	GLU362	0	47.0588	66.6667			0	8	10		0.0029904	11.8371	21.9551
